# Supplementary material for: Citalopram inhibits platelet function independently of SERT-mediated 5-HT transport
Source: PubMed Central journal article supplement (PMC5823918; doi:10.1038/s41598-018-21348-3), 2018-02-22
Supplement: 41598_2018_21348_MOESM1_ESM.pdf [file 41598_2018_21348_MOESM1_ESM.pdf]

# Citalopram inhibits platelet function independently of SERT-mediated 5-HT transport

Harvey G. Roweth<sup>1</sup>, Ruoling Yan<sup>1</sup>, Nader H. Bedwani<sup>1</sup>, Alisha Chauhan<sup>1</sup>, Nicole Fowler<sup>1</sup>, Alice H. Watson<sup>1</sup>, Jean-Daniel Malcor<sup>2</sup>, Stewart O. Sage<sup>1</sup> and \*Gavin E. Jarvis<sup>1</sup>

## Supplementary Methods

**Table S1:** Constituents and Gradients of Mobile Phases for HPLC Methods

| <u>Method</u>        | <u>Mobile Phase A</u>                                                                                                  | <u>Mobile Phase B</u> | <u>Gradient</u> |                            |
|----------------------|------------------------------------------------------------------------------------------------------------------------|-----------------------|-----------------|----------------------------|
|                      |                                                                                                                        |                       | Time (min)      | (A:B)                      |
| Nucleotide detection | Phosphate buffer<br>2.2 mM K <sub>2</sub> HPO <sub>4</sub> ;<br>47.8 mM KH <sub>2</sub> PO <sub>4</sub> ;<br>pH = 5.45 | Acetonitrile          | 0.00            | (100:0) (sample injection) |
|                      |                                                                                                                        |                       | 1.50            | (100:0)                    |
|                      |                                                                                                                        |                       | 1.51            | (98.5:1.5)                 |
|                      |                                                                                                                        |                       | 2.70            | (98.5:1.5)                 |
|                      |                                                                                                                        |                       | 4.20            | (91.0:9.0)                 |
|                      |                                                                                                                        |                       | 5.70            | (91.0:9.0)                 |
|                      |                                                                                                                        |                       | 5.80            | (25:75)                    |
|                      |                                                                                                                        |                       | 6.80            | (75:25)                    |
|                      |                                                                                                                        |                       | 6.81            | (100:0)                    |
| 5-HT detection       | Phosphate buffer<br>18.4 mM citric acid;<br>83.2 mM K <sub>2</sub> HPO <sub>4</sub> ;<br>pH = 6.6                      | Acetonitrile          | 0.00            | (94:6) (isocratic method)  |
