# Supplementary material for: Citalopram inhibits platelet function independently of SERT-mediated 5-HT transport
Source: PubMed Central journal article supplement (PMC5823918; doi:10.1038/s41598-018-21348-3), 2018-02-22
Supplement: 41598_2018_21348_MOESM2_ESM.pdf [file 41598_2018_21348_MOESM2_ESM.pdf]

# **Citalopram inhibits platelet function**

## **independently of SERT-mediated 5-HT transport**

Harvey G. Roweth<sup>1</sup>, Ruoling Yan<sup>1</sup>, Nader H. Bedwani<sup>1</sup>, Alisha Chauhan<sup>1</sup>, Nicole Fowler<sup>1</sup>, Alice H. Watson<sup>1</sup>, Jean-Daniel Malcor<sup>2</sup>, Stewart O. Sage<sup>1</sup> and \*Gavin E. Jarvis<sup>1</sup>

**Supplementary data showing western blot films  
generated during the study**

# Supplementary Figure S1

## Donor: A

\* Blot ID: HGR\_039

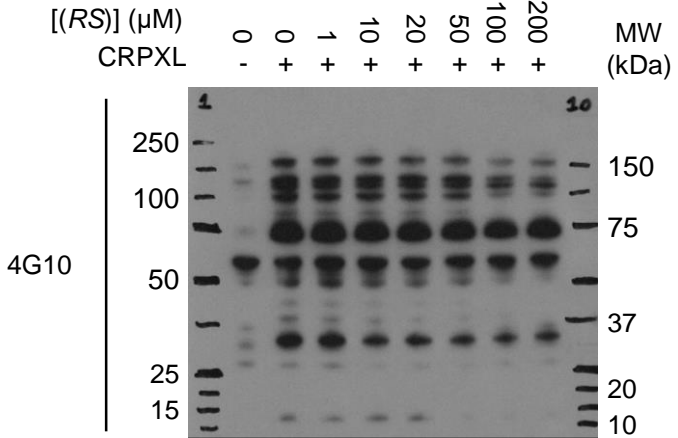

## Donor: F

Blot ID: HGR\_020

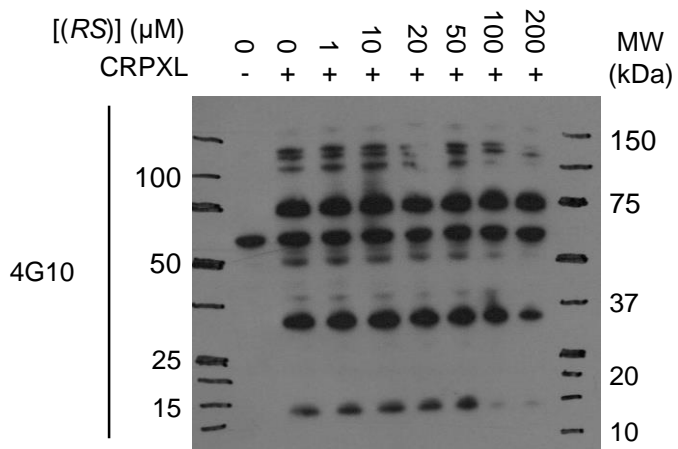

## Supplementary Figure S1 (continued)

Donor: E

\* Blot ID: HGR\_037

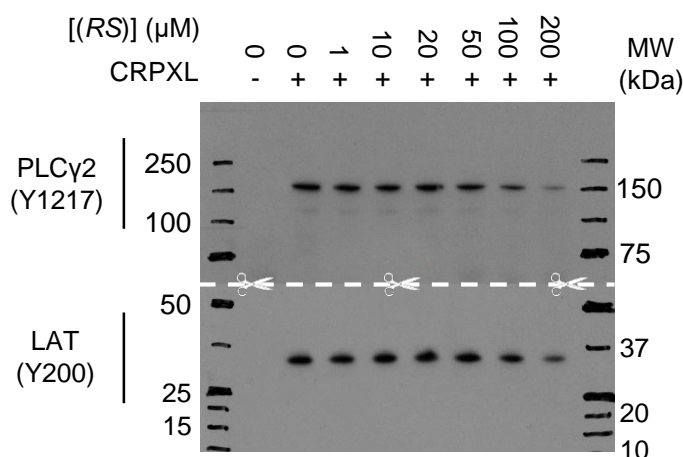

Blot ID: HGR\_038

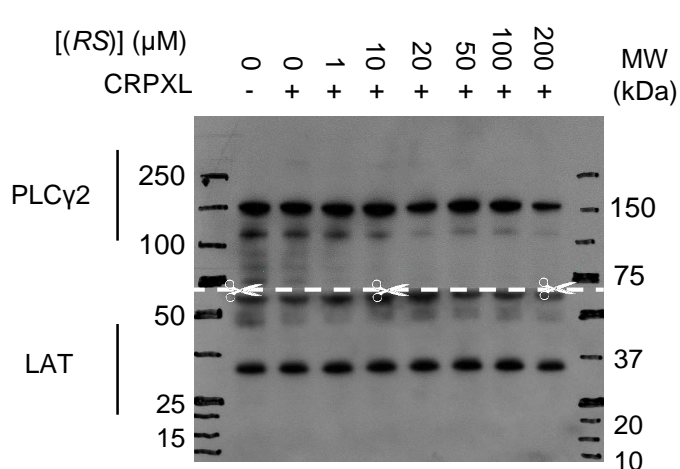

Donor: E

\* Blot ID: HGR\_062

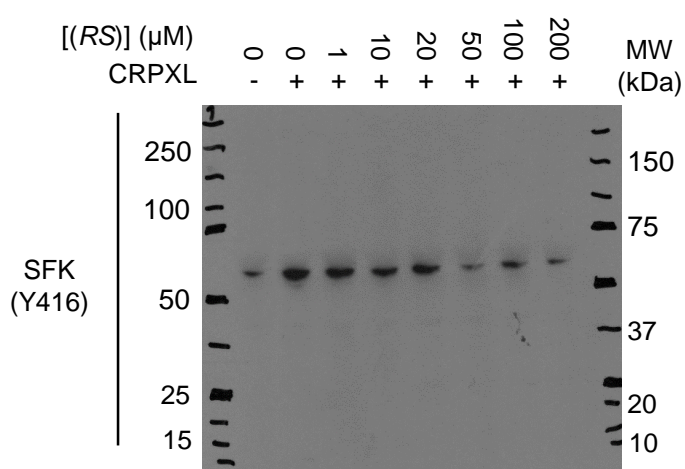

Blot ID: HGR\_063

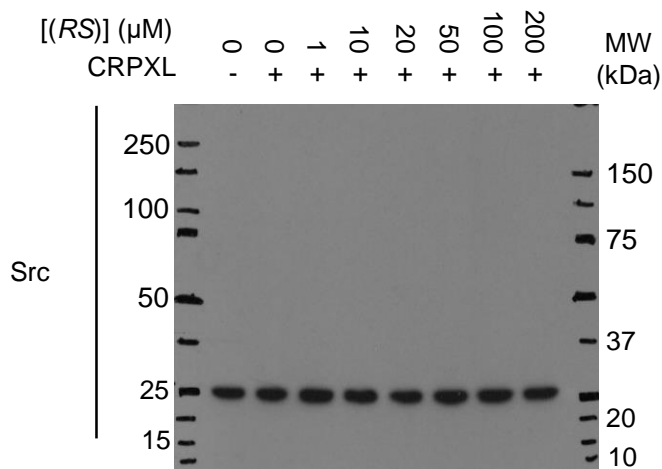

## Supplementary Figure S1 – Pilot study data

Unprocessed images of X-ray films of western blots generated in a pilot study. Samples were probed with primary antibodies against phospho-tyrosine (4G10) (N = 2 donors), and phospho-PLCγ2 (Y1217), phospho-LAT (Y200), phospho-Src family kinases (SFK) (Y416), PLCγ2, LAT and Src (N = 1 donor). Films shown in the main manuscript are indicated with \*. For undetermined reasons, the Src blot (HGR\_063, Donor E) produced a band at 25 kDa, despite Src having a molecular weight of ~60 kDa. All subsequent Src blots (Supplementary Figure S3) show bands at ~60 kDa. None of these images or any pilot study data were used in the quantitative analysis shown in Fig. 5b. 3 blood donors were used in total, labelled A, E and F.



**Supplementary Figure S2 (continued)**

**Donor: C**

Blot ID: HGR\_046

Blot ID: HGR\_047

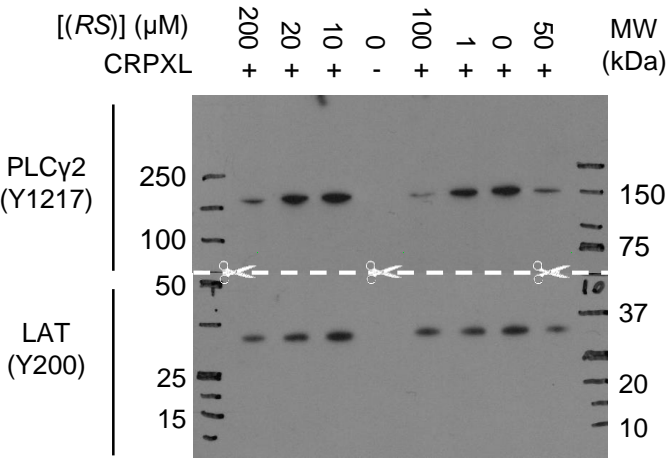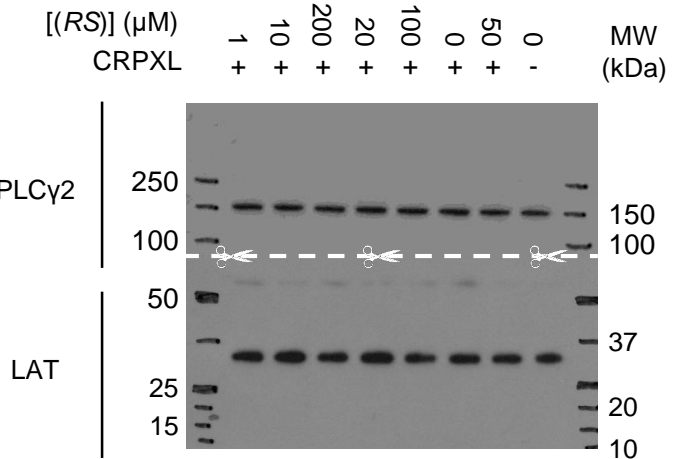

**Donor: D**

Blot ID: HGR\_048

Blot ID: HGR\_049

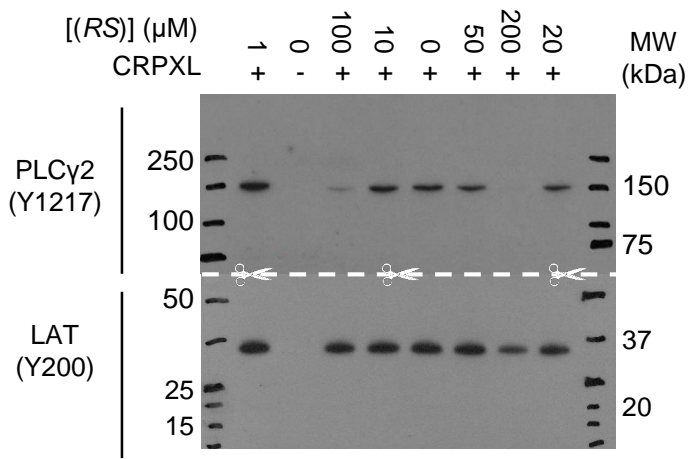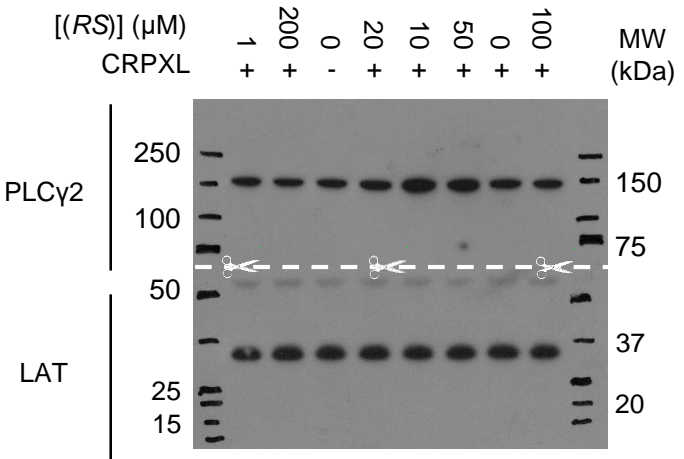



# Supplementary Figure S3

## Donor: A

Blot ID: HGR\_070

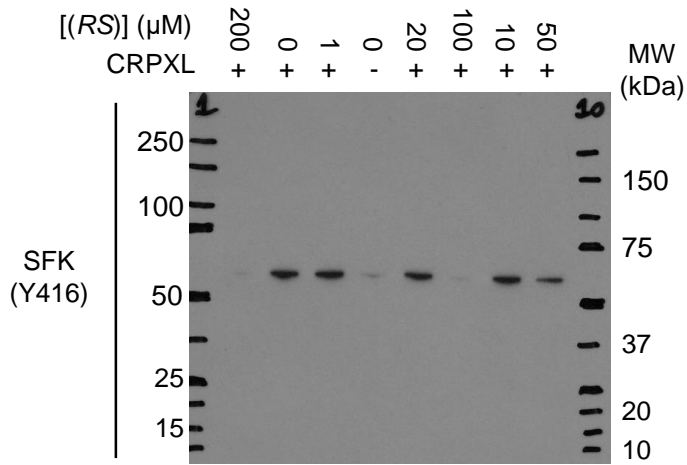

Blot ID: HGR\_071

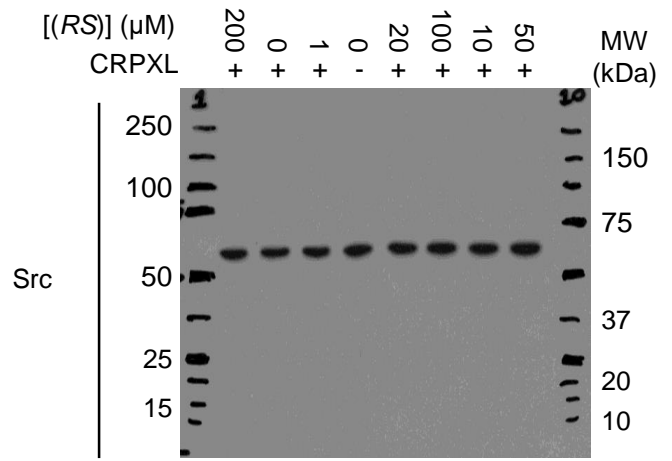

## Donor: B

Blot ID: HGR\_068

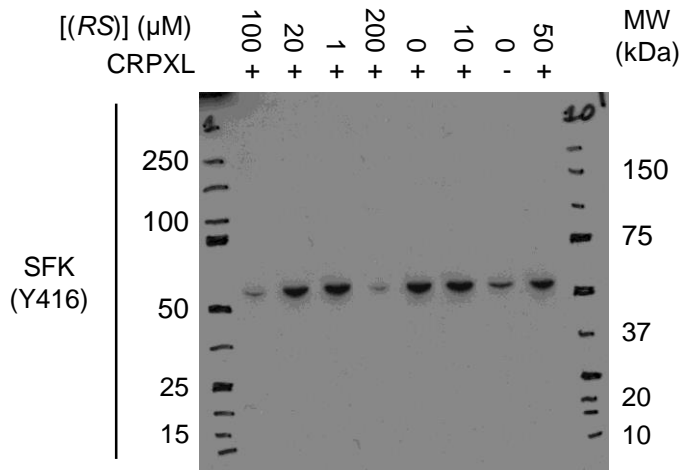

Blot ID: HGR\_069

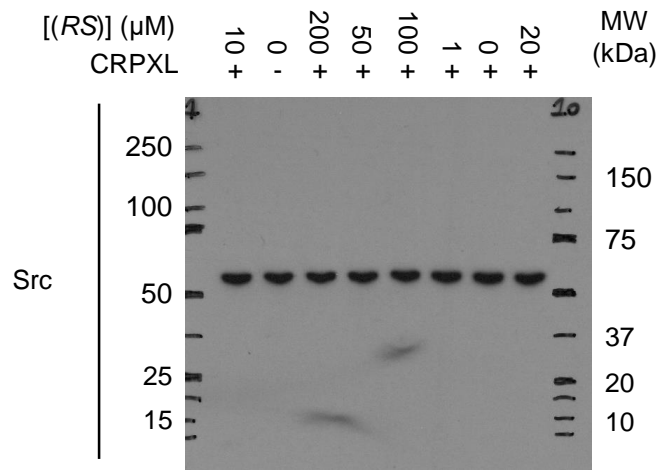

# Supplementary Figure S3 (continued)

Donor: C

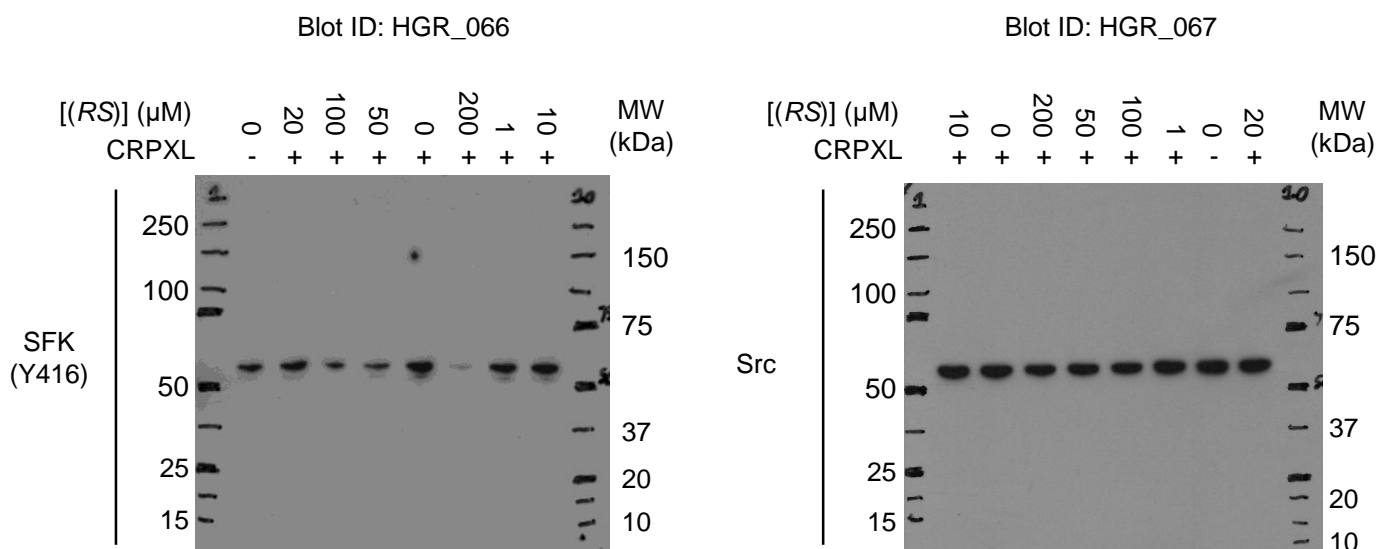

Donor: D

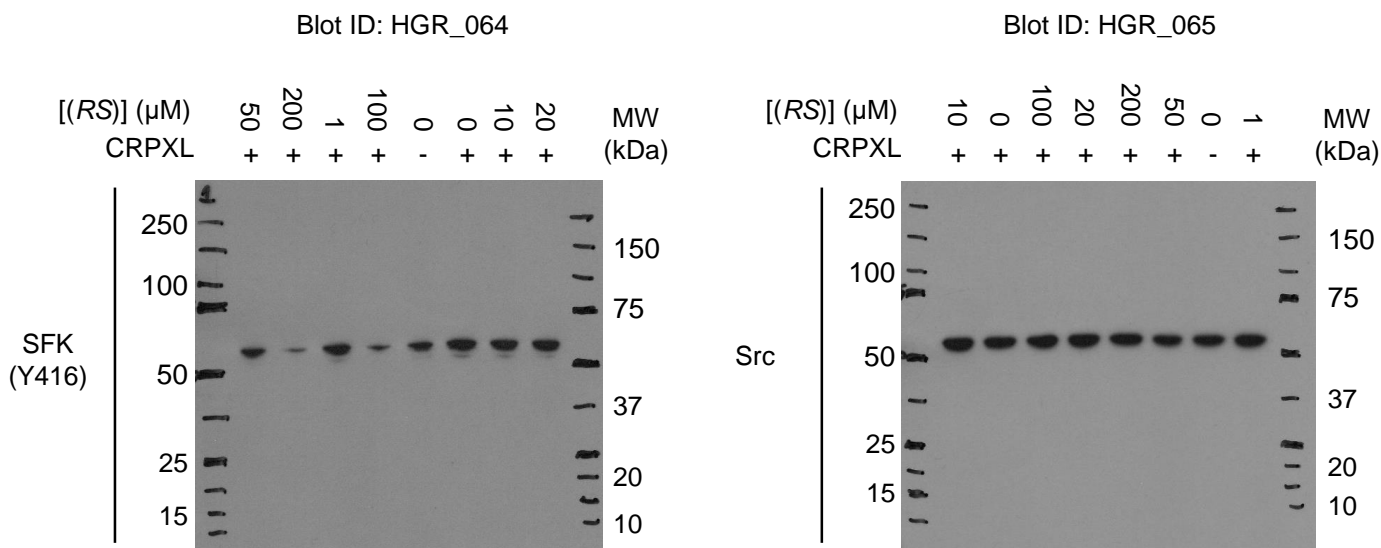

## Supplementary Figure S3

Unprocessed images of X-ray films from western blots used to quantify phospho-Src family kinases (SFK) (Y416) and Src. Samples from 4 blood donors were used in total, labelled A-D, which match donors used in Supplementary Figure S2. No data were obtained for donor E as there was insufficient material from this donor for all conditions when the analysis was performed. Samples were randomised and allocated into wells 2-9 in a blinded fashion.
